# Supplementary material
Source: PubMed Central journal article supplement (PMC3136993)

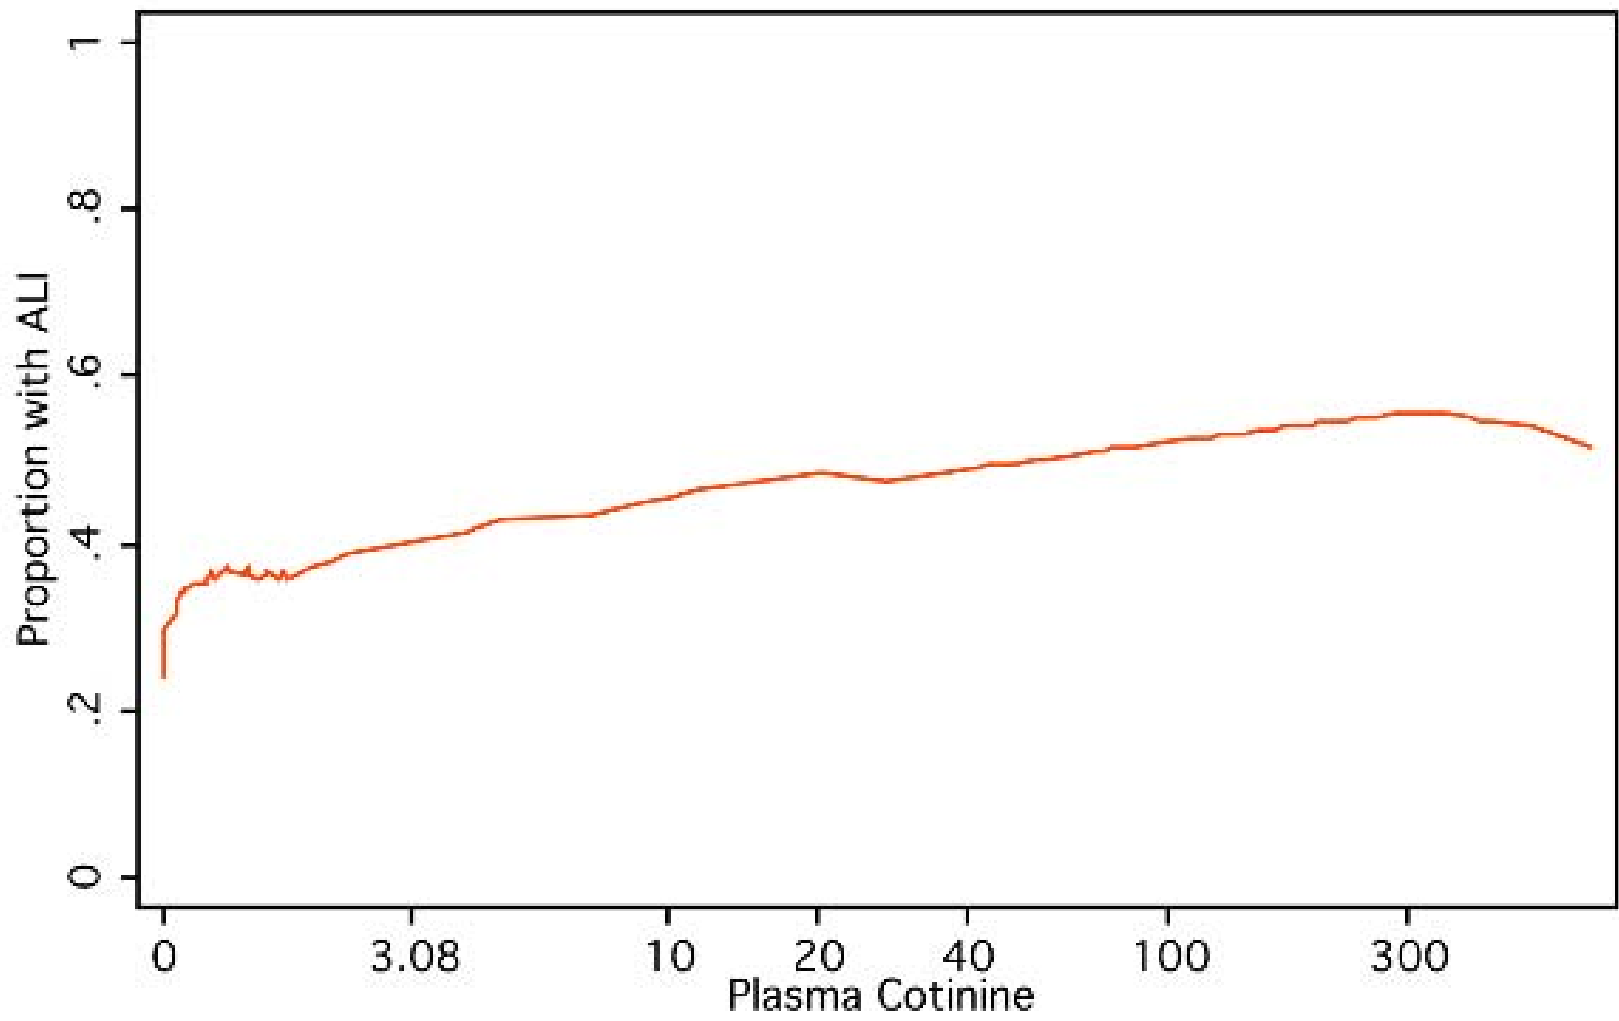

Supplement: supp_183_12_1660__2.pdf [file supp_183_12_1660__2.pdf]
